# Supplementary material
Source: PubMed Central journal article supplement (PMC167169)
Supplement: plntcell_15_8_1781__1.pdf [file plntcell_15_8_1781__1.pdf]

**Supplemental Materials**

**Supplemental Figure 1.** Representative phenotypes of six day old wild type and *txr1* mutant seedlings grown in the presence of 0 – 1600 nM thaxtomin on vertical agar plates.

Wild type (**A, C, E, G, I, K, M, O**) and *txr1* mutant seedlings (**B, D, F, H, J, L, N, P**) were grown in the presence of (**A, B**) 0 nM, (**C, D**) 12 nM, (**E, F**) 25 nM, (**G, H**) 50 nM, (**I, J**) 200 nM, (**K, L**) 400 nM, (**M, N**) 800 nM and (**O, P**) 1600 nM thaxtomin.

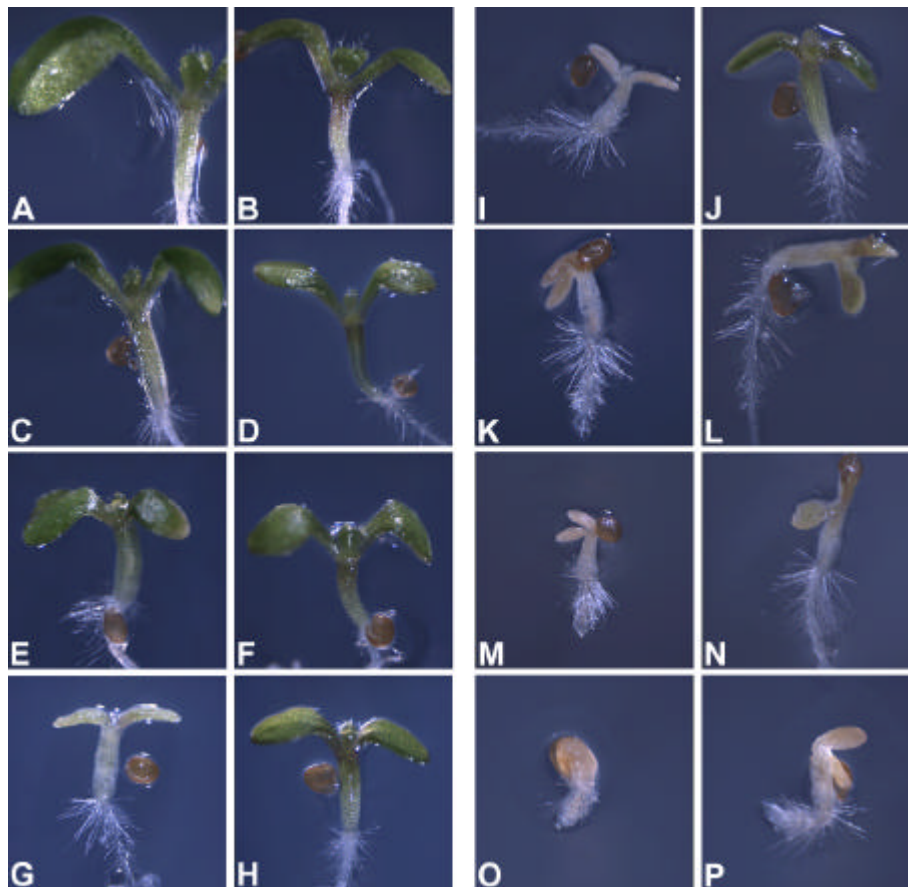

**Supplemental Figure 2.** Growth of wild type and *txr1* mutant seedlings in response to different temperatures.

Each bar represents the mean  $\pm$  standard deviation of the lengths of 15 seedlings grown in Percival chambers on vertical agar plates. Wild type is shown in black and *txr1* mutant in crosshatched bars. The lengths of the seedlings were determined at three different times (68, 92 and 116 hours) after transfer to growth cabinets set at four different temperatures (15, 21, 24 and 28°C).

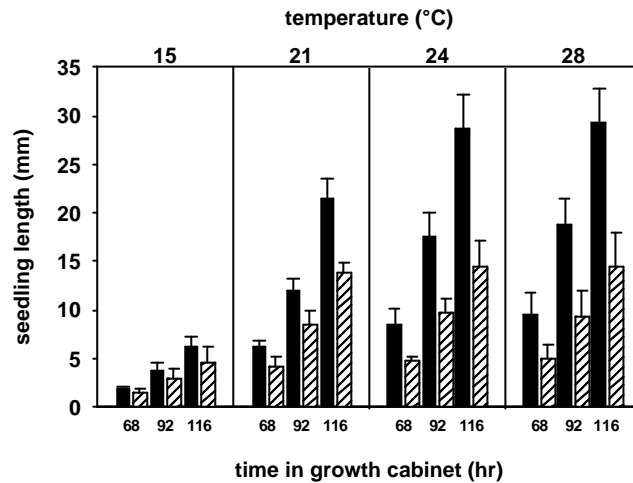

**Supplemental Table 1.** Expression profiles of genes that are significantly induced (arithmetic mean value >1) or repressed (arithmetic mean value <1) in *txr1* mutants compared to wild type plants.

Analysis was performed using a 14,300-element DNA microarray. Data points were first filtered to remove those with net (Channel 1, Cy3) or normalized net (Channel 2, Cy5) spot intensities = 500 and data points flagged as dubious. The table lists 50 genes with an expression ratio that was =2.5 standard deviation away from the mean of the  $\log_2(\text{ratio})$  value of data points from the same slide, in each of the two slides (exp 1 and 2). The primary data sets may be viewed and downloaded from the Stanford Microarray Database (<http://genome-www5.stanford.edu/MicroArray/SMD/>, Experiment ID # 21779 and 21780).

| Gene Code | Putative Function                                           | Arithmetic Mean | Log2 values Mean | Log2 values Std. Dev. |
|-----------|-------------------------------------------------------------|-----------------|------------------|-----------------------|
| At2g21640 | hypothetical protein                                        | 3,252           | 1,702            | 1,143                 |
| At2g03760 | steroid sulfotransferase                                    | 2,863           | 1,518            | 0,466                 |
| At5g54100 | stomatin-like                                               | 2,366           | 1,243            | 0,037                 |
| At3g01600 | hypothetical protein                                        | 2,328           | 1,219            | 0,069                 |
| At2g03130 | 50S ribosomal protein L7/L12                                | 2,327           | 1,219            | 0,663                 |
| At4g27585 | stomatin-like                                               | 2,208           | 1,143            | 0,517                 |
| At5g55200 | chaperone GrpE-like protein                                 | 2,202           | 1,139            | 0,191                 |
| At3g29185 | hypothetical protein                                        | 2,138           | 1,096            | 0,020                 |
| At5g43450 | 1-aminocyclopropane-1-carboxylate oxidase                   | 2,093           | 1,066            | 0,296                 |
| At5g50160 | FRO1 and FRO2-like protein                                  | 2,088           | 1,062            | 0,287                 |
| At3g27780 | myb transcription factor                                    | 2,006           | 1,004            | 0,051                 |
| At5g56350 | pyruvate kinase                                             | 1,989           | 0,992            | 0,107                 |
| At3g45730 | hypothetical protein                                        | 1,979           | 0,985            | 0,045                 |
| At4g15760 | hypothetical protein                                        | 1,966           | 0,975            | 0,156                 |
| At1g17580 | myosin, putative                                            | 1,931           | 0,950            | 0,322                 |
| At5g19550 | aspartate aminotransferase Asp2                             | 1,893           | 0,921            | 0,125                 |
| At4g27210 | hypothetical protein                                        | 1,888           | 0,917            | 0,035                 |
| At2g36790 | putative glucosyl transferase                               | 1,869           | 0,902            | 0,095                 |
| At1g05680 | indole-3-acetate beta-glucosyltransferase-like              | 1,815           | 0,860            | 0,164                 |
| At5g42060 | hypothetical protein                                        | 1,798           | 0,846            | 0,066                 |
| At2g15750 | putative non-LTR retroelement reverse transcriptase         | 1,794           | 0,844            | 0,059                 |
| At5g36230 | H. sapiens protein of unknown function                      | 1,794           | 0,844            | 0,276                 |
| At3g27770 | hypothetical protein                                        | 1,767           | 0,821            | 0,066                 |
| At1g70310 | spermidine synthase                                         | 1,720           | 0,782            | 0,071                 |
| At1g69370 | chorismate mutase                                           | 1,706           | 0,771            | 0,013                 |
| At1g70560 | putative alliinase                                          | 1,703           | 0,769            | 0,172                 |
| At1g80130 | hypothetical protein                                        | 1,697           | 0,763            | 0,168                 |
| At2g36530 | enolase (2-phospho-D-glycerate hydroylase)                  | 1,686           | 0,754            | 0,136                 |
| At5g49560 | hypothetical protein                                        | 1,665           | 0,736            | 0,115                 |
| At1g52600 | microsomal signal peptidase 21 KD subunit                   | 1,641           | 0,715            | 0,075                 |
| At2g47480 | hypothetical protein                                        | 0,606           | -0,724           | 0,141                 |
| At1g22530 | hypothetical protein                                        | 0,596           | -0,746           | 0,124                 |
| At4g15940 | similarity to 2-hydroxyhepta-2,4-diene-1,7-dioate isomerase | 0,592           | -0,756           | 0,127                 |
| At5g64570 | beta-xylosidase                                             | 0,579           | -0,788           | 0,185                 |
| At5g49360 | xylosidase                                                  | 0,577           | -0,794           | 0,097                 |
| At3g16240 | delta tonoplast integral protein                            | 0,567           | -0,820           | 0,053                 |
| At1g53750 | 26S proteasome ATPase subunit                               | 0,562           | -0,832           | 0,032                 |
| At4g19420 | putative pectinacetylesterase                               | 0,556           | -0,848           | 0,307                 |
| At5g24770 | vegetative storage protein Vsp2                             | 0,527           | -0,924           | 0,415                 |
| At2g36620 | ribosomal protein L24                                       | 0,521           | -0,941           | 0,311                 |
| At5g14120 | nodulin-like protein                                        | 0,517           | -0,952           | 0,012                 |
| At5g59310 | nonspecific lipid-transfer protein precursor                | 0,517           | -0,953           | 0,323                 |
| At4g15210 | beta-amylase                                                | 0,502           | -0,994           | 0,057                 |
| At2g43550 | putative trypsin inhibitor                                  | 0,474           | -1,077           | 0,182                 |
| At5g61440 | thioredoxin-like 3                                          | 0,447           | -1,163           | 0,363                 |
| At1g75750 | hypothetical protein                                        | 0,430           | -1,218           | 0,047                 |
| At2g02990 | ribonuclease 1                                              | 0,426           | -1,231           | 0,156                 |
| At2g38770 | hypothetical protein                                        | 0,325           | -1,620           | 0,249                 |
| At1G75750 | hypothetical protein                                        | 0,299           | -1,741           | 0,077                 |
| At5g24240 | ubiquitin                                                   | 0,280           | -1,838           | 0,069                 |
